# Supplementary material
Source: PubMed Central journal article supplement (PMC3515076)
Supplement: NIHMS422155-supplement-01.pdf [file NIHMS422155-supplement-01.pdf]

## Supplemental Information

### Visualizing the Determinants

### of Viral RNA Recognition

### by Innate Immune Sensor RIG-I

Dahai Luo, Andrew Kohlway, Adriana Vela, and Anna Marie Pyle

#### Inventory of Supplemental Information

**Figure S1. Secondary folding of 5'ppp8L hairpin and panhandle-like viral genomic RNAs, related to Figure 1.**

**Figure S2. Crystal structures of RIG-I ( $\Delta$ CARDs): dsRNA, related to Figure 1.**

**Figure S3. 5'ppp8L stimulates ATP hydrolysis by RIG-I (blue) and RIG-I ( $\Delta$ CARDs 1-238) (red), related to Figure 2 and Table S1.**

**Figure S4. Binding of full-length RIG-I and CTD mutants to a triphosphorylated RNA duplex, related to Figure 1.**

**Movie S1. Modeling the ATP - induced conformational changes within RIG-I, related to Figure 3.**

**Table S1. 5'ppp8L stimulated ATP hydrolysis by RIG-I, related to Figure 2 and S3.**

#### References

## Supplementary Figures

### Figure S1. Secondary folding of 5'ppp8L hairpin and panhandle-like viral genomic RNAs, related to Figure 1.

- 5'ppp8L hairpin  
5' GG CGCGGCUUCG GCCGCG CC 3'
- gi|73919206|ref|NC\_007366.1| Influenza A virus, segment 4.  
5' AGCAAAAGCAG...TTGTTTCTACT 3'
- gi|19718363|ref|NC\_003461.1| Human parainfluenza virus 1  
5' ACCAAACAAG ...CUUGUCUGGU 3'
- gi|9627197|ref|NC\_001542.1| Rabies virus, complete genome  
5' ACGCUUAACA ... UGUUAAGCGU 3'
- gi|9629198|ref|NC\_001781.1| Human respiratory syncytial virus  
5' ACGCGAAAAA ... UUUUUCUCGU 3'
- gi|10313991|ref|NC\_002549.1| Zaire ebolavirus, complete genome  
5' CGGACACACA ... UGUGUGUCCA 3'

### Figure S2. Crystal structures of RIG-I ( $\Delta$ CARDs): dsRNA, related to Figure 1 and 2.

(A) Superposition of RIG-I ( $\Delta$ CARDs 1-238): 5'ppp8L: ADP-Mg<sup>2+</sup> (Yellow) and RIG-I ( $\Delta$ CARDs 1-229): GC10: SO<sub>4</sub> (Blue). RMSD is 0.38 Å for 559 C $\alpha$  atoms. (B) Superposition of known RIG-I: 5' tri-phosphorylated RNA complex. Red: RIG-I ( $\Delta$ CARDs 1-238): 5'ppp8L: ADP-Mg<sup>2+</sup>; Purple: RIG-I CTD and 5'ppp-dsRNA14 (PDB: 3LRN); Blue: RIG-I CTD and 5'ppp-dsRNA12 (PDB: 3NCU); Green: RIG-I CTD and 5'ppp-dsRNA12 (PDB: 3LRR). Among the structures, the closest distance between RIG-I and the  $\gamma$  phosphate is 3.7 Å (3LRR). (C) Fo-Fc omit map (green) and 2Fo-Fc (blue) map cover the 5'ppp8L hairpin, contoured at 3.0 and 1.0  $\sigma$  respectively. (D) 2Fo-Fc electron density map at the ATPase active site is in blue and contoured at 1.0  $\sigma$ .

### Figure S3. 5'ppp8L stimulates ATP hydrolysis by RIG-I (blue) and RIG-I ( $\Delta$ CARDs 1-238) (red), related to Figure 2 and Table S1.

Each data point is an average of triplicates. The ATPase assays were performed as described previously (Luo et al., 2011). For experiments varying ATP concentrations, 50  $\mu$ l reaction mixtures (50 nM of protein, 5x NADH enzyme buffer, 25 mM MOPS pH 7.4, 10 mM Mg(OAc)<sub>2</sub>, 30 mM K(OAc), 10 mM NaCl, 2 mM DTT and 400 nM RNA) were mixed with 0-5 mM ATP at 25 °C. The 5x enzyme buffer contained 1 mM NADH, 100 U of lactic dehydrogenase/ml, 500 U of pyruvate kinase/ml, and 2.5 mM phosphoenolpyruvate. Fluorescence readings (excitation, 340 nm; emission, 450 nm) were collected in Corning 96 well black half area flat bottom plates in a SpectraMax 250 plate reader. Initial velocities were calculated from a linear regression of each time course and corrected for background ATP hydrolysis and NADH oxidation. The initial velocities at varying ATP concentrations were plotted and fit to the Michaelis-Menten equation,  $v_0 = [V_{max} \cdot [S] / (K_m + [S])]$ .

**Figure S4. Binding of full-length RIG-I and CTD mutants to a triphosphorylated RNA duplex, related to Figure 1.**

Amino acids within the CTD- triphosphate interaction network were mutagenized, and variants F853A and H847A expressed sufficiently well for biophysical studies. Affinity of the WT and mutant proteins were then studied using a calibrated electrophoretic mobility shift assay (EMSA) that has been used to quantitate the role of individual protein domains to recognition by RIG-I (Vela, A, submitted). The RNA ligand is a 14-mer RNA duplex, which is a length that binds RIG-I as a monomer(Luo et al., 2011), and which contains a single 5'-triphosphate at one end. The resultant  $K_d$  values were obtained: Full-length RIG-I =  $168 \pm 12.8$  pM; RIG-I H847A =  $1230 \pm 68$  pM; RIG-I F853A =  $254 \pm 19.6$  pM. Error bars represent the standard deviation in three complete replicates of each binding curve. In the absence of a 5'-triphosphate, binding affinity of H847A to duplex RNA was not significantly different than that of WT, underscoring the role of this amino acid specifically in 5'-triphosphate recognition (data not shown). Data are consistent with previous analysis on the CTD domain protein by Wang *et al*(Wang et al., 2010).

**Figure S1.**

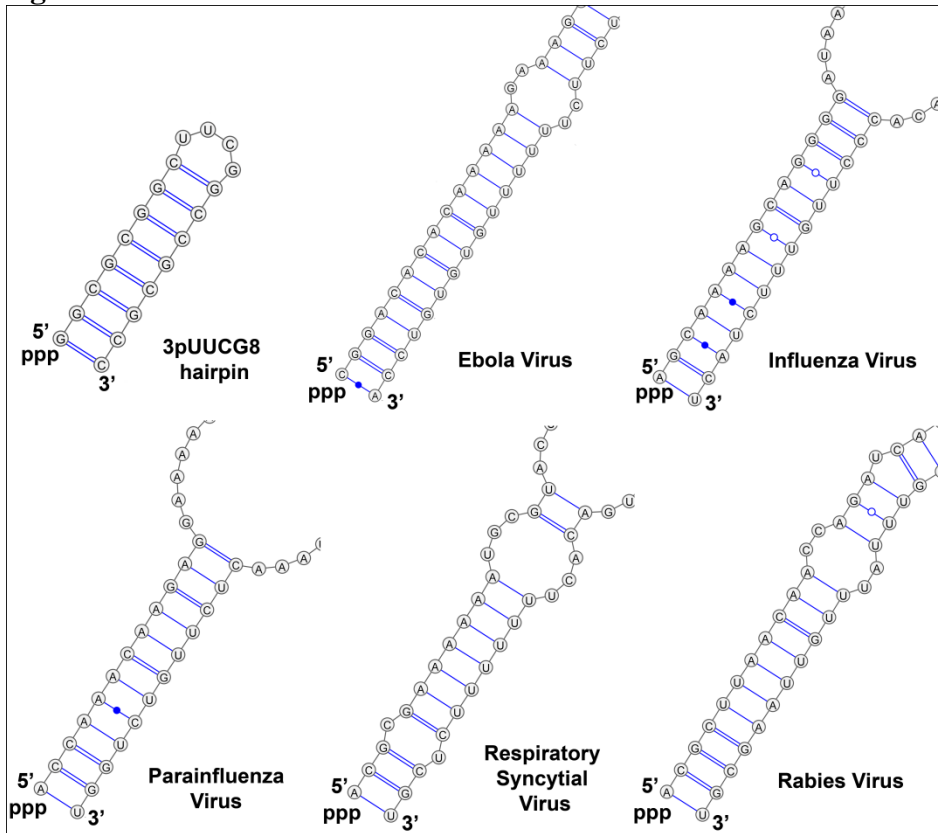

**Figure S2.**  
**(A)**

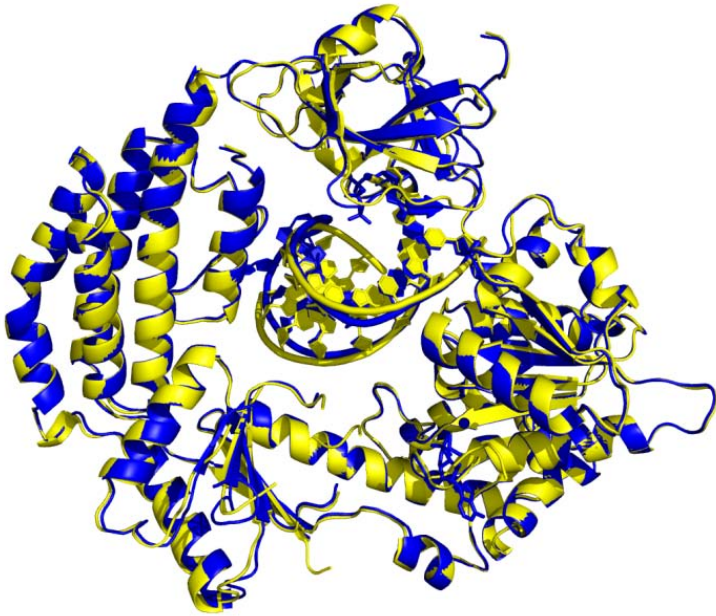

**(B)**

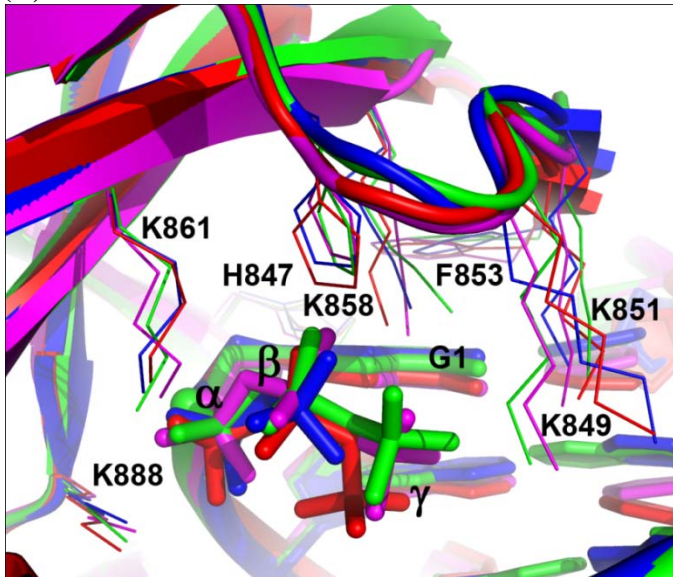

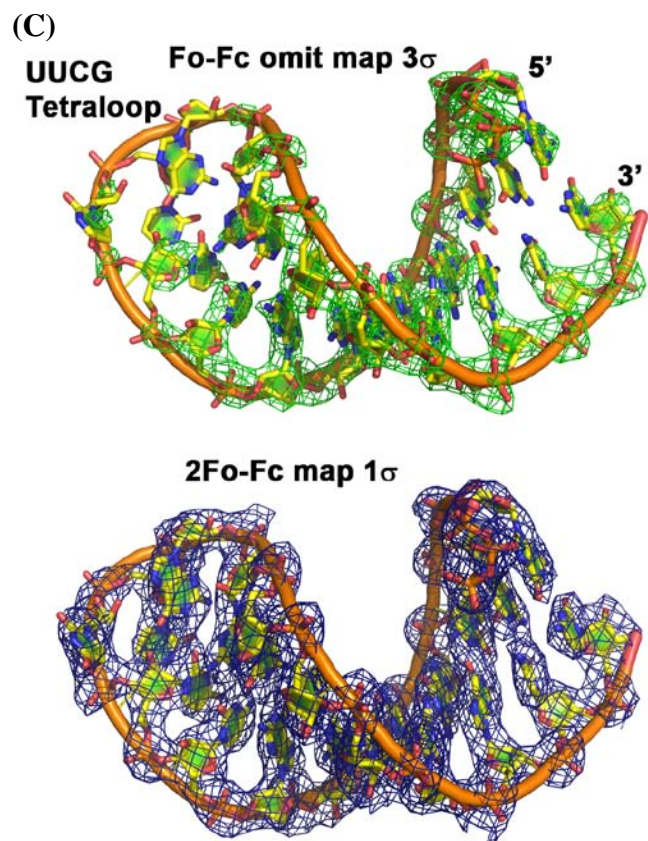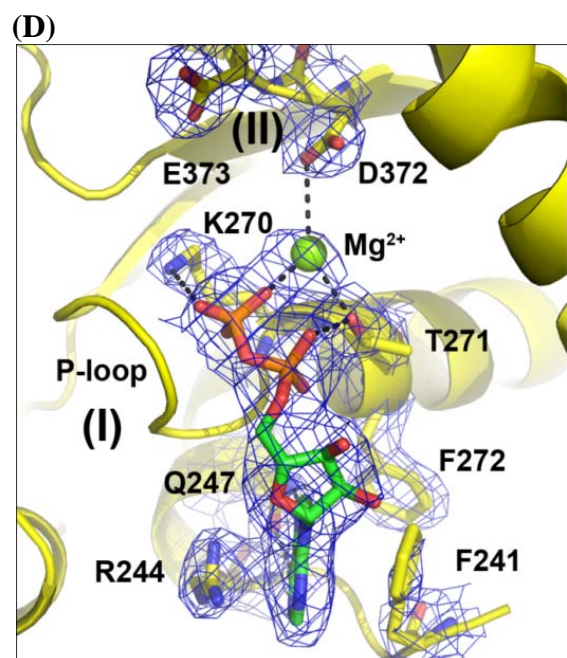

Figure S3.

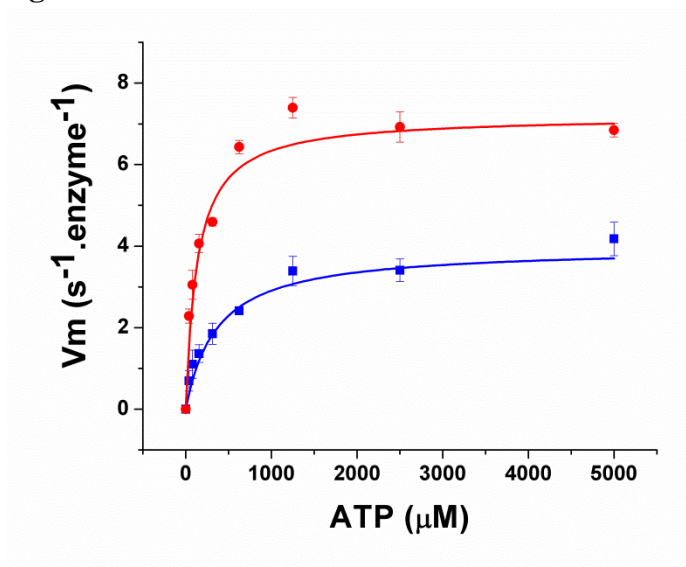

Figure S4.

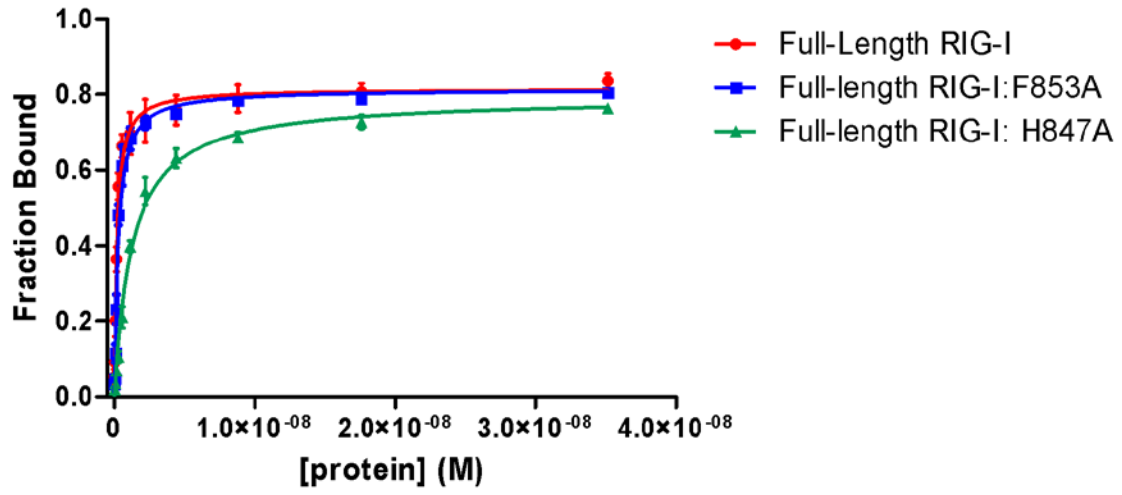



**Table S1. 5'ppp8L stimulated ATP hydrolysis by RIG-I, related to Figure 2, 3 and S3.**

|                                                               |                                      |                  |
|---------------------------------------------------------------|--------------------------------------|------------------|
| $K_M$ ( $\mu\text{M}$ )                                       | RIG-I ( $\Delta\text{CARDs 1-238}$ ) | RIG-I            |
|                                                               | $134.8 \pm 31.4$                     | $365.2 \pm 76.4$ |
| $k_{\text{CAT}}$ ( $\text{s}^{-1} \cdot \text{enzyme}^{-1}$ ) | RIG-I ( $\Delta\text{CARDs 1-238}$ ) | RIG-I            |
|                                                               | $7.2 \pm 0.4$                        | $4.0 \pm 0.3$    |

## References

Kowalinski, E., Lunardi, T., McCarthy, A. A., Louber, J., Brunel, J., Grigorov, B., Gerlier, D., and Cusack, S. (2011). Structural basis for the activation of innate immune pattern-recognition receptor RIG-I by viral RNA. *Cell* *147*, 423-435.

Luo, D., Ding, S. C., Vela, A., Kohlway, A., Lindenbach, B. D., and Pyle, A. M. (2011). Structural insights into RNA recognition by RIG-I. *Cell* *147*, 409-422.

Wang, Y., Ludwig, J., Schuberth, C., Goldeck, M., Schlee, M., Li, H., Juranek, S., Sheng, G., Micura, R., Tuschl, T., *et al.* (2010). Structural and functional insights into 5'-ppp RNA pattern recognition by the innate immune receptor RIG-I. *Nat Struct Mol Biol* *17*, 781-787.
